# Supplementary material for: Responses of maize hybrids to water stress conditions at different developmental stages: accumulation of reactive oxygen species, activity of enzymatic antioxidants and degradation in kernel quality traits
Source: PeerJ. 2023 Mar 20;11:e14983. doi: 10.7717/peerj.14983 (PMC10035423; doi:10.7717/peerj.14983)
Supplement: Supplemental Information 1 [file peerj-11-14983-s001.xlsx]

## Sheet: Drought-1
						Consolidated Data
	Sr. No	Hybrids	Treatment	DA 50%	DS 50%	PH	EH	EL	EW	R/E	NK/R	NK/E	GY	TKW	Pn	SPAD	Ptotein %	Oil %	Satrch %	Tr	Ci	WUE	Chl a	Chl b	Chl a+b	Chl (a/b)	Carotinionds	Proline	H2O2	MDA	T-SOD	CAT
	YH-5482 ©	YH-5482	Control	74.0833	77.0833	178.267	96.4667	18.9333	49.9167	17.5167	39.9333	699.437	9695.3	288.8	31.8	36.3333	14.1167	5.13333	49.3167	3.1	273.5	10.2604	2.675	1.64	4.315	1.63136	1.945	7.65	2.35	120.5	37.5	9.85
	YH-5427 ©	YH-5427	Control	70.8333	73.6333	184.65	94.15	18.95	46.995	17.5167	39.7167	695.885	9671.01	343.15	31.1167	36.8167	14.25	4.63333	49.9	3.25	290.5	9.57292	2.79	1.685	4.475	1.65613	1.965	7.65	2.15	122	37.5	10.25
	NK-8441 ©	NK-8441	Control	66.1667	69.2167	187.6	86.15	19.8667	47.7417	15.35	38.9667	577.5	9510.02	264.55	31.1333	27.2167	13.95	4.1	53.25	3.2	276	9.72917	2.78	1.55	4.33	1.80571	1.86	8.15	1.85	120.5	37.5	9.75
	JPL-1908 ©	JPL-1908	Control	72.8333	75.9833	224.983	89.9833	18.0167	46.8483	15.5167	38.3	620.51	8478.86	341.2	26.5	33.0333	13.8	4.5	46.2333	2.85	269.5	9.32407	2.455	1.45	3.905	1.70713	1.775	6.65	1.7	117.5	34.5	10.25
	YH-5395 ©	YH-5395	Control	74.5	77.7	201.767	80.4667	20.5833	47.7233	16.8333	38.0333	662.067	9903.6	367	33.9667	33.7167	13.5	3.95	49.5167	3.2	321.5	10.7274	2.835	1.625	4.46	1.75381	1.985	8	1.85	122.5	39	9.8
	YH-5482 (Pre)	YH-5482	Pre Anthesis Drought	72.9833	76.0333	170.35	90.65	18.15	45.6933	16	38.1667	610.667	6489.59	258.3	20.7667	19.8667	13.5	4.13333	46.1	2.6	209.5	7.98551	2.19	1.29	3.48	1.70562	1.75	11.55	4.3	162.5	49.5	7.65
	YH-5427 (Pre)	YH-5427	Pre Anthesis Drought	73.15	76.1	157.6	75.4833	17.9167	44.2117	16.8167	37.3667	628.366	6469.67	315.45	20.1333	21.1667	13.4333	4.25	44.9667	2.6	223	7.64718	2.195	1.32	3.515	1.66093	1.83	12.55	3.4	152.5	48	8.55
	NK-8441 (Pre)	NK-8441	Pre Anthesis Drought	69.2167	72.3167	163.9	71.1833	17.7667	43.9917	14.4833	36.9333	516.289	6243.81	220.35	21.25	23.6667	12.5167	3.8	50.95	2.35	184	9.3295	2.01	1.27	3.28	1.58846	1.61	12.45	3.65	154	49.5	7.2
	JPL-1908 (Pre)	JPL-1908	Pre Anthesis Drought	68.3333	71.6667	179.6	81.5833	17.4	42.9367	14.8167	34.4667	510.096	6764.13	310.7	17.8167	22.6167	13.1833	4.25	44.7167	2.4	193	7.42366	1.92	1.205	3.125	1.59471	1.45	12.25	3.8	157.5	52	7.65
	YH-5395 (Pre)	YH-5395	Pre Anthesis Drought	70.0667	73.1167	169.05	71.1	17.7	44.3117	14.8333	35.2	522.167	7180.48	326.75	22.2333	23.8	12.85	3.75	47.65	2.55	218	8.80042	2.155	1.3	3.455	1.66043	1.65	12.85	4.05	163	56	7.95
	YH-5482 (Dur)	YH-5482	During Anthesis Drought	72.25	75.25	168.4	90.2	17.95	45.15	15.8	37.75	596.45	6350.5	255.5	20.2167	22.7	13.65	4.03333	48.35	2.9	210.5	6.95958	2.345	1.545	3.89	1.51586	1.73	15.45	5.3	162	54	7.7
	YH-5427 (Dur)	YH-5427	During Anthesis Drought	72.95	75.95	157	76.2	17.7	43.7	16.65	37.35	621.85	6664	263.45	22.85	25.35	13.6167	3.95	49.65	3.1	256.1	7.36875	2.57	1.57	4.14	1.63573	1.755	16.65	4.75	162.5	60.5	8.25
	NK-8441 (Dur)	NK-8441	During Anthesis Drought	69	72	163.85	71.15	17.45	43.7	13.9	36.25	503.28	6113.5	217.5	16.75	18.75	11.85	3.75	52.1	2.85	213.5	5.88704	2.505	1.485	3.99	1.68665	1.785	15.65	5.25	164.5	55	7.55
	JPL-1908 (Dur)	JPL-1908	During Anthesis Drought	68.05	71.05	186.3	81.85	16.95	42.75	14.7	34.05	499.86	6194.5	307.1	17.55	18.6	12.9333	4.35	45.85	2.55	175.5	6.89308	2.015	1.18	3.195	1.71503	1.64	12.65	5.25	157.5	51.5	7.6
	YH-5395 (Dur)	YH-5395	During Anthesis Drought	69.8167	72.8167	174.5	72.55	17.5	44	14.55	34.2	497.645	6921.5	321.6	23.9	23.9	12.8	3.81667	49.1	3.1	246	7.70968	2.535	1.575	4.11	1.60982	1.815	15.95	4.9	156	61.5	8.15
	YH-5482 (Post)	YH-5482	Post Anthesis Drought	73.6667	76.6667	175.333	96.6667	17	47.8867	16.6667	37.6667	626	7326.64	251.405	21.75	23.55	13.35	3.85	48.25	2.85	223	7.64286	2.48	1.43	3.91	1.73498	1.755	15.6	5.35	162	54	7.25
	YH-5427 (Post)	YH-5427	Post Anthesis Drought	70.6667	73.6667	171.667	97.6667	17.6667	46.9533	16.6667	38	633.333	7831.5	309.605	20.1	25.6	13.4333	3.95	48.65	2.95	237.5	6.82874	2.575	1.4	3.975	1.84333	1.785	16.3	5.1	160.5	58.5	8.4
	NK-8441 (Post)	NK-8441	Post Anthesis Drought	67.6667	70.3333	185.333	91.3333	16.3333	43.5167	15.3333	36.6667	561.333	7113.91	220.005	18	20.2	11.6667	3.75	50.35	2.55	191	7.06692	2.555	1.54	4.095	1.65968	1.785	15.1	5.8	169	51	7.8
	JPL-1908 (Post)	JPL-1908	Post Anthesis Drought	67	70	203.667	87.3333	17.3333	45.4833	14.6667	30.6667	546.333	6959.88	313.805	17.5	16.7	12.9833	4.35	45.65	2.2	164	7.95455	1.96	1.2	3.16	1.63449	1.615	13.15	5.75	166.5	52.5	7.85
	YH-5395 (Post)	YH-5395	Post Anthesis Drought	67.6667	70.6667	184.333	80	17	45.64	14.6667	33	543.667	7811.97	326.905	22.45	24.05	12.8	3.7	48.4167	2.95	236	7.61149	2.58	1.435	4.015	1.79734	1.805	16.3	5.2	158.5	58.5	8.6

## Sheet: Correlation & PCA Sheet
		Hybrids and Treatments	DA 50%	DS 50%	PH	EH	EL	EW	R/E	NK/R	NK/E	GY	TKW	Pn	Ptotein %	Oil %	Satrch %	Tr	Ci	WUE	Chl a	Chl b	Carotinionds	Proline	H2O2	MDA	T-SOD	CAT
		YH-5482-Control	74.0833	77.0833	178.267	96.4667	18.9333	49.9167	17.5167	39.9333	699.437	9695.3	288.8	31.8	14.1167	5.13333	49.3167	3.1	273.5	10.2604	2.675	1.64	1.945	7.65	2.35	120.5	37.5	9.85
		YH-5427 -Control	70.8333	73.6333	184.65	94.15	18.95	46.995	17.5167	39.7167	695.885	9671.01	343.15	31.1167	14.25	4.63333	49.9	3.25	290.5	9.57292	2.79	1.685	1.965	7.65	2.15	122	37.5	10.25
		NK-8441-Control	66.1667	69.2167	187.6	86.15	19.8667	47.7417	15.35	38.9667	577.5	9510.02	264.55	31.1333	13.95	4.1	53.25	3.2	276	9.72917	2.78	1.55	1.86	8.15	1.85	120.5	37.5	9.75
		JPL-1908-Control	72.8333	75.9833	224.983	89.9833	18.0167	46.8483	15.5167	38.3	620.51	8478.86	341.2	26.5	13.8	4.5	46.2333	2.85	269.5	9.32407	2.455	1.45	1.775	6.65	1.7	117.5	34.5	10.25
		YH-5395-Control	74.5	77.7	201.767	80.4667	20.5833	47.7233	16.8333	38.0333	662.067	9903.6	367	33.9667	13.5	3.95	49.5167	3.2	321.5	10.7274	2.835	1.625	1.985	8	1.85	122.5	39	9.8
		YH-5482 (Pre-Anthesis)	72.9833	76.0333	170.35	90.65	18.15	45.6933	16	38.1667	610.667	6489.59	258.3	20.7667	13.5	4.13333	46.1	2.6	209.5	7.98551	2.19	1.29	1.75	11.55	4.3	162.5	49.5	7.65
		YH-5427 (Pre-Anthesis)	73.15	76.1	157.6	75.4833	17.9167	44.2117	16.8167	37.3667	628.366	6469.67	315.45	20.1333	13.4333	4.25	44.9667	2.6	223	7.64718	2.195	1.32	1.83	12.55	3.4	152.5	48	8.55
		NK-8441 (Pre-Anthesis)	69.2167	72.3167	163.9	71.1833	17.7667	43.9917	14.4833	36.9333	516.289	6243.81	220.35	21.25	12.5167	3.8	50.95	2.35	184	9.3295	2.01	1.27	1.61	12.45	3.65	154	49.5	7.2
		JPL-1908 (Pre-Anthesis)	68.3333	71.6667	179.6	81.5833	17.4	42.9367	14.8167	34.4667	510.096	6764.13	310.7	17.8167	13.1833	4.25	44.7167	2.4	193	7.42366	1.92	1.205	1.45	12.25	3.8	157.5	52	7.65
		YH-5395 (Pre-Anthesis)	70.0667	73.1167	169.05	71.1	17.7	44.3117	14.8333	35.2	522.167	7180.48	326.75	22.2333	12.85	3.75	47.65	2.55	218	8.80042	2.155	1.3	1.65	12.85	4.05	163	56	7.95
		YH-5482 (Dur-Anthesis)	72.25	75.25	168.4	90.2	17.95	45.15	15.8	37.75	596.45	6350.5	255.5	20.2167	13.65	4.03333	48.35	2.9	210.5	6.95958	2.345	1.545	1.73	15.45	5.3	162	54	7.7
		YH-5427 (Dur-Anthesis)	72.95	75.95	157	76.2	17.7	43.7	16.65	37.35	621.85	6664	263.45	22.85	13.6167	3.95	49.65	3.1	256.1	7.36875	2.57	1.57	1.755	16.65	4.75	162.5	60.5	8.25
		NK-8441 (Dur-Anthesis)	69	72	163.85	71.15	17.45	43.7	13.9	36.25	503.28	6113.5	217.5	16.75	11.85	3.75	52.1	2.85	213.5	5.88704	2.505	1.485	1.785	15.65	5.25	164.5	55	7.55
		JPL-1908 (Dur-Anthesis)	68.05	71.05	186.3	81.85	16.95	42.75	14.7	34.05	499.86	6194.5	307.1	17.55	12.9333	4.35	45.85	2.55	175.5	6.89308	2.015	1.18	1.64	12.65	5.25	157.5	51.5	7.6
		YH-5395 (Dur-Anthesis)	69.8167	72.8167	174.5	72.55	17.5	44	14.55	34.2	497.645	6921.5	321.6	23.9	12.8	3.81667	49.1	3.1	246	7.70968	2.535	1.575	1.815	15.95	4.9	156	61.5	8.15
		YH-5482 (Post-Anthesis)	73.6667	76.6667	175.333	96.6667	17	47.8867	16.6667	37.6667	626	7326.64	251.405	21.75	13.35	3.85	48.25	2.85	223	7.64286	2.48	1.43	1.755	15.6	5.35	162	54	7.25
		YH-5427 (Post-Anthesis)	70.6667	73.6667	171.667	97.6667	17.6667	46.9533	16.6667	38	633.333	7831.5	309.605	20.1	13.4333	3.95	48.65	2.95	237.5	6.82874	2.575	1.4	1.785	16.3	5.1	160.5	58.5	8.4
		NK-8441 (Post-Anthesis)	67.6667	70.3333	185.333	91.3333	16.3333	43.5167	15.3333	36.6667	561.333	7113.91	220.005	18	11.6667	3.75	50.35	2.55	191	7.06692	2.555	1.54	1.785	15.1	5.8	169	51	7.8
		JPL-1908 (Post-Anthesis)	67	70	203.667	87.3333	17.3333	45.4833	14.6667	30.6667	546.333	6959.88	313.805	17.5	12.9833	4.35	45.65	2.2	164	7.95455	1.96	1.2	1.615	13.15	5.75	166.5	52.5	7.85
		YH-5395 (Post-Anthesis)	67.6667	70.6667	184.333	80	17	45.64	14.6667	33	543.667	7811.97	326.905	22.45	12.8	3.7	48.4167	2.95	236	7.61149	2.58	1.435	1.805	16.3	5.2	158.5	58.5	8.6
		Hybrids and Treatments	DA 50%	DS 50%	PH	EH	EL	EW	R/E	NK/R	NK/E	GY	TKW	Pn	Ptotein %	Oil %	Satrch %	Tr	Ci	WUE	Chl a	Chl b	Carotinionds	Proline	H2O2	MDA	T-SOD	CAT
		YH-5482-Control	74.0833	77.0833	178.267	96.4667	18.9333	49.9167	17.5167	39.9333	699.437	9695.3	288.8	31.8	14.1167	5.13333	49.3167	3.1	273.5	10.2604	2.675	1.64	1.945	7.65	2.35	120.5	37.5	9.85
		YH-5427 -Control	70.8333	73.6333	184.65	94.15	18.95	46.995	17.5167	39.7167	695.885	9671.01	343.15	31.1167	14.25	4.63333	49.9	3.25	290.5	9.57292	2.79	1.685	1.965	7.65	2.15	122	37.5	10.25
		NK-8441-Control	66.1667	69.2167	187.6	86.15	19.8667	47.7417	15.35	38.9667	577.5	9510.02	264.55	31.1333	13.95	4.1	53.25	3.2	276	9.72917	2.78	1.55	1.86	8.15	1.85	120.5	37.5	9.75
		JPL-1908-Control	72.8333	75.9833	224.983	89.9833	18.0167	46.8483	15.5167	38.3	620.51	8478.86	341.2	26.5	13.8	4.5	46.2333	2.85	269.5	9.32407	2.455	1.45	1.775	6.65	1.7	117.5	34.5	10.25
		YH-5395-Control	74.5	77.7	201.767	80.4667	20.5833	47.7233	16.8333	38.0333	662.067	9903.6	367	33.9667	13.5	3.95	49.5167	3.2	321.5	10.7274	2.835	1.625	1.985	8	1.85	122.5	39	9.8
		Hybrids and Treatments	DA 50%	DS 50%	PH	EH	EL	EW	R/E	NK/R	NK/E	GY	TKW	Pn	Ptotein %	Oil %	Satrch %	Tr	Ci	WUE	Chl a	Chl b	Carotinionds	Proline	H2O2	MDA	T-SOD	CAT
		YH-5482 (Pre-Anthesis)	72.9833	76.0333	170.35	90.65	18.15	45.6933	16	38.1667	610.667	6489.59	258.3	20.7667	13.5	4.13333	46.1	2.6	209.5	7.98551	2.19	1.29	1.75	11.55	4.3	162.5	49.5	7.65
		YH-5427 (Pre-Anthesis)	73.15	76.1	157.6	75.4833	17.9167	44.2117	16.8167	37.3667	628.366	6469.67	315.45	20.1333	13.4333	4.25	44.9667	2.6	223	7.64718	2.195	1.32	1.83	12.55	3.4	152.5	48	8.55
		NK-8441 (Pre-Anthesis)	69.2167	72.3167	163.9	71.1833	17.7667	43.9917	14.4833	36.9333	516.289	6243.81	220.35	21.25	12.5167	3.8	50.95	2.35	184	9.3295	2.01	1.27	1.61	12.45	3.65	154	49.5	7.2
		JPL-1908 (Pre-Anthesis)	68.3333	71.6667	179.6	81.5833	17.4	42.9367	14.8167	34.4667	510.096	6764.13	310.7	17.8167	13.1833	4.25	44.7167	2.4	193	7.42366	1.92	1.205	1.45	12.25	3.8	157.5	52	7.65
		YH-5395 (Pre-Anthesis)	70.0667	73.1167	169.05	71.1	17.7	44.3117	14.8333	35.2	522.167	7180.48	326.75	22.2333	12.85	3.75	47.65	2.55	218	8.80042	2.155	1.3	1.65	12.85	4.05	163	56	7.95
		Hybrids and Treatments	DA 50%	DS 50%	PH	EH	EL	EW	R/E	NK/R	NK/E	GY	TKW	Pn	Ptotein %	Oil %	Satrch %	Tr	Ci	WUE	Chl a	Chl b	Carotinionds	Proline	H2O2	MDA	T-SOD	CAT
		YH-5482 (Dur-Anthesis)	72.25	75.25	168.4	90.2	17.95	45.15	15.8	37.75	596.45	6350.5	255.5	20.2167	13.65	4.03333	48.35	2.9	210.5	6.95958	2.345	1.545	1.73	15.45	5.3	162	54	7.7
		YH-5427 (Dur-Anthesis)	72.95	75.95	157	76.2	17.7	43.7	16.65	37.35	621.85	6664	263.45	22.85	13.6167	3.95	49.65	3.1	256.1	7.36875	2.57	1.57	1.755	16.65	4.75	162.5	60.5	8.25
		NK-8441 (Dur-Anthesis)	69	72	163.85	71.15	17.45	43.7	13.9	36.25	503.28	6113.5	217.5	16.75	11.85	3.75	52.1	2.85	213.5	5.88704	2.505	1.485	1.785	15.65	5.25	164.5	55	7.55
		JPL-1908 (Dur-Anthesis)	68.05	71.05	186.3	81.85	16.95	42.75	14.7	34.05	499.86	6194.5	307.1	17.55	12.9333	4.35	45.85	2.55	175.5	6.89308	2.015	1.18	1.64	12.65	5.25	157.5	51.5	7.6
		YH-5395 (Dur-Anthesis)	69.8167	72.8167	174.5	72.55	17.5	44	14.55	34.2	497.645	6921.5	321.6	23.9	12.8	3.81667	49.1	3.1	246	7.70968	2.535	1.575	1.815	15.95	4.9	156	61.5	8.15
		Hybrids and Treatments	DA 50%	DS 50%	PH	EH	EL	EW	R/E	NK/R	NK/E	GY	TKW	Pn	Ptotein %	Oil %	Satrch %	Tr	Ci	WUE	Chl a	Chl b	Carotinionds	Proline	H2O2	MDA	T-SOD	CAT
		YH-5482 (Post-Anthesis)	73.6667	76.6667	175.333	96.6667	17	47.8867	16.6667	37.6667	626	7326.64	251.405	21.75	13.35	3.85	48.25	2.85	223	7.64286	2.48	1.43	1.755	15.6	5.35	162	54	7.25
		YH-5427 (Post-Anthesis)	70.6667	73.6667	171.667	97.6667	17.6667	46.9533	16.6667	38	633.333	7831.5	309.605	20.1	13.4333	3.95	48.65	2.95	237.5	6.82874	2.575	1.4	1.785	16.3	5.1	160.5	58.5	8.4
		NK-8441 (Post-Anthesis)	67.6667	70.3333	185.333	91.3333	16.3333	43.5167	15.3333	36.6667	561.333	7113.91	220.005	18	11.6667	3.75	50.35	2.55	191	7.06692	2.555	1.54	1.785	15.1	5.8	169	51	7.8
		JPL-1908 (Post-Anthesis)	67	70	203.667	87.3333	17.3333	45.4833	14.6667	30.6667	546.333	6959.88	313.805	17.5	12.9833	4.35	45.65	2.2	164	7.95455	1.96	1.2	1.615	13.15	5.75	166.5	52.5	7.85
		YH-5395 (Post-Anthesis)	67.6667	70.6667	184.333	80	17	45.64	14.6667	33	543.667	7811.97	326.905	22.45	12.8	3.7	48.4167	2.95	236	7.61149	2.58	1.435	1.805	16.3	5.2	158.5	58.5	8.6

## Sheet: Correlation tests_HID
	DA 50%	DS 50%	PH	EH	EL	EW	R/E	NK/R	NK/E	GY	TKW	Pn	SPAD	Ptotein %	Oil %	Satrch %	Tr	Ci	WUE	Chl a	Chl b	Chl a+b	Chl (a/b)	Carotinionds	Proline	H2O2	MDA	T-SOD	CAT
DA 50%	1	0.99905	0.522255	0.636179	0.374017	0.203399	0.214361	0.44907	0.287879	0.401818	0.295963	0.276773	0.360483	0.658728	0.453192	0.211328	0.0481066	0.00333786	0.0722558	0.191589	0.204435	0.198364	0.0949601	0.532151	0.50415	0.308083	0.527071	0.382423	0.565577
DS 50%	0.99905	1	0.52367	0.625435	0.377978	0.194738	0.194492	0.434727	0.270032	0.393799	0.275468	0.270033	0.347702	0.651414	0.455048	0.226372	0.0278454	0.0228973	0.093492	0.173774	0.187011	0.180546	0.0933168	0.523504	0.494043	0.296295	0.519417	0.370269	0.569008
PH	0.522255	0.52367	1	0.610501	0.499779	0.446404	0.470323	0.47154	0.366054	0.637576	0.279687	0.607343	0.619192	0.394219	0.502152	0.514077	0.294888	0.202539	0.138165	0.486848	0.451496	0.477172	0.0565659	0.631498	0.518846	0.487673	0.660694	0.559529	0.821096
EH	0.636179	0.625435	0.610501	1	0.456533	0.193504	0.228372	0.485268	0.312808	0.560996	0.579216	0.506758	0.578033	0.741861	0.696835	0.0538936	0.348791	0.323845	0.00163627	0.337324	0.268221	0.312978	0.163375	0.3533	0.621622	0.536213	0.668251	0.612716	0.553975
EL	0.374017	0.377978	0.499779	0.456533	1	0.432672	0.200679	0.405212	0.351268	0.723891	0.36617	0.635374	0.586847	0.109649	0.352224	0.424794	0.676194	0.616526	0.237781	0.530893	0.40986	0.487721	0.268385	0.509747	0.782301	0.84573	0.848457	0.786731	0.381877
EW	0.203399	0.194738	0.446404	0.193504	0.432672	1	0.448434	0.455388	0.48269	0.695107	0.233665	0.645748	0.554449	0.0109985	0.153982	0.4829	0.661958	0.59696	0.264166	0.671602	0.592874	0.646405	0.143745	0.623351	0.589779	0.59497	0.593886	0.641489	0.376768
R/E	0.214361	0.194492	0.470323	0.228372	0.200679	0.448434	1	0.466202	0.775386	0.555966	0.579736	0.586581	0.616251	0.184813	0.184956	0.288694	0.449373	0.437908	0.0336283	0.670068	0.725134	0.697772	0.392342	0.51935	0.288203	0.366004	0.422328	0.303619	0.43258
NK/R	0.44907	0.434727	0.47154	0.485268	0.405212	0.455388	0.466202	1	0.804819	0.598617	0.571316	0.379507	0.479115	0.406353	0.299444	0.313496	0.482741	0.423668	0.379097	0.40549	0.371814	0.395757	0.0429483	0.412383	0.630908	0.625446	0.660529	0.682743	0.373135
NK/E	0.287879	0.270032	0.366054	0.312808	0.351268	0.48269	0.775386	0.804819	1	0.65213	0.593339	0.546815	0.590514	0.311862	0.0997305	0.401999	0.560528	0.581904	0.246976	0.62892	0.665765	0.649054	0.287357	0.533481	0.498661	0.545163	0.574578	0.541547	0.36813
GY	0.401818	0.393799	0.637576	0.560996	0.723891	0.695107	0.555966	0.598617	0.65213	1	0.505788	0.92358	0.890391	0.270189	0.439684	0.525719	0.777448	0.763241	0.0866799	0.86317	0.793584	0.843283	0.0246655	0.754926	0.742844	0.855904	0.877153	0.789062	0.640696
TKW	0.295963	0.275468	0.279687	0.579216	0.36617	0.233665	0.579736	0.571316	0.593339	0.505788	1	0.402717	0.472874	0.39112	0.442873	0.0889983	0.529424	0.481583	0.308787	0.359004	0.302837	0.339965	0.12803	0.118517	0.557547	0.602306	0.633655	0.548433	0.213223
Pn	0.276773	0.270033	0.607343	0.506758	0.635374	0.645748	0.586581	0.379507	0.546815	0.92358	0.402717	1	0.916335	0.273211	0.448444	0.51148	0.688856	0.733062	0.149657	0.858259	0.831627	0.855316	0.136531	0.723444	0.588973	0.730099	0.738506	0.653429	0.681307
SPAD	0.360483	0.347702	0.619192	0.578033	0.586847	0.554449	0.616251	0.479115	0.590514	0.890391	0.472874	0.916335	1	0.398546	0.464466	0.448584	0.618344	0.683936	0.108279	0.843608	0.809308	0.837503	0.0960335	0.726192	0.538403	0.731442	0.740882	0.657442	0.701872
Ptotein %	0.658728	0.651414	0.394219	0.741861	0.109649	0.0109985	0.184813	0.406353	0.311862	0.270189	0.39112	0.273211	0.398546	1	0.610799	0.0549868	0.102433	0.0158266	0.333869	0.0447309	0.0526228	0.0482476	0.0256132	0.220742	0.254918	0.216349	0.313641	0.297932	0.577846
Oil %	0.453192	0.455048	0.502152	0.696835	0.352224	0.153982	0.184956	0.299444	0.0997305	0.439684	0.442873	0.448444	0.464466	0.610799	1	0.0199837	0.137031	0.107687	0.277643	0.132644	0.0621961	0.105956	0.22386	0.0896552	0.475005	0.393406	0.511381	0.462188	0.428998
Satrch %	0.211328	0.226372	0.514077	0.0538936	0.424794	0.4829	0.288694	0.313496	0.401999	0.525719	0.0889983	0.51148	0.448584	0.0549868	0.0199837	1	0.202212	0.164561	0.229023	0.405002	0.458902	0.4299	0.330804	0.522059	0.305806	0.308863	0.440069	0.322265	0.478116
Tr	0.0481066	0.0278454	0.294888	0.348791	0.676194	0.661958	0.449373	0.482741	0.560528	0.777448	0.529424	0.688856	0.618344	0.102433	0.137031	0.202212	1	0.934654	0.590532	0.815389	0.699847	0.776904	0.219769	0.540149	0.7827	0.840787	0.761015	0.810386	0.148358
Ci	0.00333786	0.0228973	0.202539	0.323845	0.616526	0.59696	0.437908	0.423668	0.581904	0.763241	0.481583	0.733062	0.683936	0.0158266	0.107687	0.164561	0.934654	1	0.440221	0.839651	0.740382	0.807816	0.167899	0.562258	0.655388	0.803272	0.663532	0.753906	0.20452
WUE	0.0722558	0.093492	0.138165	0.00163627	0.237781	0.264166	0.0336283	0.379097	0.246976	0.0866799	0.308787	0.149657	0.108279	0.333869	0.277643	0.229023	0.590532	0.440221	1	0.201013	0.0766618	0.153611	0.430283	0.0635524	0.482831	0.369386	0.294273	0.451329	0.420955
Chl a	0.191589	0.173774	0.486848	0.337324	0.530893	0.671602	0.670068	0.40549	0.62892	0.86317	0.359004	0.858259	0.843608	0.0447309	0.132644	0.405002	0.815389	0.839651	0.201013	1	0.963382	0.994361	0.128087	0.836472	0.566018	0.674489	0.652664	0.624578	0.483513
Chl b	0.204435	0.187011	0.451496	0.268221	0.40986	0.592874	0.725134	0.371814	0.665765	0.793584	0.302837	0.831627	0.809308	0.0526228	0.0621961	0.458902	0.699847	0.740382	0.0766618	0.963382	1	0.986384	0.38696	0.83868	0.452082	0.532419	0.54812	0.487171	0.489349
Chl a+b	0.198364	0.180546	0.477172	0.312978	0.487721	0.646405	0.697772	0.395757	0.649054	0.843283	0.339965	0.855316	0.837503	0.0482476	0.105956	0.4299	0.776904	0.807816	0.153611	0.994361	0.986384	1	0.231602	0.844743	0.525963	0.624266	0.617089	0.575758	0.490097
Chl (a/b)	0.0949601	0.0933168	0.0565659	0.163375	0.268385	0.143745	0.392342	0.0429483	0.287357	0.0246655	0.12803	0.136531	0.0960335	0.0256132	0.22386	0.330804	0.219769	0.167899	0.430283	0.128087	0.38696	0.231602	1	0.241558	0.276051	0.33866	0.198851	0.349302	0.188815
Carotinionds	0.532151	0.523504	0.631498	0.3533	0.509747	0.623351	0.51935	0.412383	0.533481	0.754926	0.118517	0.723444	0.726192	0.220742	0.0896552	0.522059	0.540149	0.562258	0.0635524	0.836472	0.83868	0.844743	0.241558	1	0.524904	0.540259	0.604293	0.552979	0.699788
Proline	0.50415	0.494043	0.518846	0.621622	0.782301	0.589779	0.288203	0.630908	0.498661	0.742844	0.557547	0.588973	0.538403	0.254918	0.475005	0.305806	0.7827	0.655388	0.482831	0.566018	0.452082	0.525963	0.276051	0.524904	1	0.819033	0.914386	0.936432	0.296575
H2O2	0.308083	0.296295	0.487673	0.536213	0.84573	0.59497	0.366004	0.625446	0.545163	0.855904	0.602306	0.730099	0.731442	0.216349	0.393406	0.308863	0.840787	0.803272	0.369386	0.674489	0.532419	0.624266	0.33866	0.540259	0.819033	1	0.921432	0.909069	0.447075
MDA	0.527071	0.519417	0.660694	0.668251	0.848457	0.593886	0.422328	0.660529	0.574578	0.877153	0.633655	0.738506	0.740882	0.313641	0.511381	0.440069	0.761015	0.663532	0.294273	0.652664	0.54812	0.617089	0.198851	0.604293	0.914386	0.921432	1	0.920154	0.535652
T-SOD	0.382423	0.370269	0.559529	0.612716	0.786731	0.641489	0.303619	0.682743	0.541547	0.789062	0.548433	0.653429	0.657442	0.297932	0.462188	0.322265	0.810386	0.753906	0.451329	0.624578	0.487171	0.575758	0.349302	0.552979	0.936432	0.909069	0.920154	1	0.394671
CAT	0.565577	0.569008	0.821096	0.553975	0.381877	0.376768	0.43258	0.373135	0.36813	0.640696	0.213223	0.681307	0.701872	0.577846	0.428998	0.478116	0.148358	0.20452	0.420955	0.483513	0.489349	0.490097	0.188815	0.699788	0.296575	0.447075	0.535652	0.394671	1

## Sheet: Correlation tests_HID1
	DA 50%	DS 50%	PH	EH	EL	EW	R/E	NK/R	NK/E	GY	TKW	Pn	SPAD	Ptotein %	Oil %	Satrch %	Tr	Ci	WUE	Chl a	Chl b	Chl a+b	Chl (a/b)	Carotinionds	Proline	H2O2	MDA	T-SOD	CAT
DA 50%	1	0.99905	0.522255	0.636179	0.374017	0.203399	0.214361	0.44907	0.287879	0.401818	0.295963	0.276773	0.360483	0.658728	0.453192	0.211328	0.0481066	0.00333786	0.0722558	0.191589	0.204435	0.198364	0.0949601	0.532151	0.50415	0.308083	0.527071	0.382423	0.565577
DS 50%	0.99905	1	0.52367	0.625435	0.377978	0.194738	0.194492	0.434727	0.270032	0.393799	0.275468	0.270033	0.347702	0.651414	0.455048	0.226372	0.0278454	0.0228973	0.093492	0.173774	0.187011	0.180546	0.0933168	0.523504	0.494043	0.296295	0.519417	0.370269	0.569008
PH	0.522255	0.52367	1	0.610501	0.499779	0.446404	0.470323	0.47154	0.366054	0.637576	0.279687	0.607343	0.619192	0.394219	0.502152	0.514077	0.294888	0.202539	0.138165	0.486848	0.451496	0.477172	0.0565659	0.631498	0.518846	0.487673	0.660694	0.559529	0.821096
EH	0.636179	0.625435	0.610501	1	0.456533	0.193504	0.228372	0.485268	0.312808	0.560996	0.579216	0.506758	0.578033	0.741861	0.696835	0.0538936	0.348791	0.323845	0.00163627	0.337324	0.268221	0.312978	0.163375	0.3533	0.621622	0.536213	0.668251	0.612716	0.553975
EL	0.374017	0.377978	0.499779	0.456533	1	0.432672	0.200679	0.405212	0.351268	0.723891	0.36617	0.635374	0.586847	0.109649	0.352224	0.424794	0.676194	0.616526	0.237781	0.530893	0.40986	0.487721	0.268385	0.509747	0.782301	0.84573	0.848457	0.786731	0.381877
EW	0.203399	0.194738	0.446404	0.193504	0.432672	1	0.448434	0.455388	0.48269	0.695107	0.233665	0.645748	0.554449	0.0109985	0.153982	0.4829	0.661958	0.59696	0.264166	0.671602	0.592874	0.646405	0.143745	0.623351	0.589779	0.59497	0.593886	0.641489	0.376768
R/E	0.214361	0.194492	0.470323	0.228372	0.200679	0.448434	1	0.466202	0.775386	0.555966	0.579736	0.586581	0.616251	0.184813	0.184956	0.288694	0.449373	0.437908	0.0336283	0.670068	0.725134	0.697772	0.392342	0.51935	0.288203	0.366004	0.422328	0.303619	0.43258
NK/R	0.44907	0.434727	0.47154	0.485268	0.405212	0.455388	0.466202	1	0.804819	0.598617	0.571316	0.379507	0.479115	0.406353	0.299444	0.313496	0.482741	0.423668	0.379097	0.40549	0.371814	0.395757	0.0429483	0.412383	0.630908	0.625446	0.660529	0.682743	0.373135
NK/E	0.287879	0.270032	0.366054	0.312808	0.351268	0.48269	0.775386	0.804819	1	0.65213	0.593339	0.546815	0.590514	0.311862	0.0997305	0.401999	0.560528	0.581904	0.246976	0.62892	0.665765	0.649054	0.287357	0.533481	0.498661	0.545163	0.574578	0.541547	0.36813
GY	0.401818	0.393799	0.637576	0.560996	0.723891	0.695107	0.555966	0.598617	0.65213	1	0.505788	0.92358	0.890391	0.270189	0.439684	0.525719	0.777448	0.763241	0.0866799	0.86317	0.793584	0.843283	0.0246655	0.754926	0.742844	0.855904	0.877153	0.789062	0.640696
TKW	0.295963	0.275468	0.279687	0.579216	0.36617	0.233665	0.579736	0.571316	0.593339	0.505788	1	0.402717	0.472874	0.39112	0.442873	0.0889983	0.529424	0.481583	0.308787	0.359004	0.302837	0.339965	0.12803	0.118517	0.557547	0.602306	0.633655	0.548433	0.213223
Pn	0.276773	0.270033	0.607343	0.506758	0.635374	0.645748	0.586581	0.379507	0.546815	0.92358	0.402717	1	0.916335	0.273211	0.448444	0.51148	0.688856	0.733062	0.149657	0.858259	0.831627	0.855316	0.136531	0.723444	0.588973	0.730099	0.738506	0.653429	0.681307
SPAD	0.360483	0.347702	0.619192	0.578033	0.586847	0.554449	0.616251	0.479115	0.590514	0.890391	0.472874	0.916335	1	0.398546	0.464466	0.448584	0.618344	0.683936	0.108279	0.843608	0.809308	0.837503	0.0960335	0.726192	0.538403	0.731442	0.740882	0.657442	0.701872
Ptotein %	0.658728	0.651414	0.394219	0.741861	0.109649	0.0109985	0.184813	0.406353	0.311862	0.270189	0.39112	0.273211	0.398546	1	0.610799	0.0549868	0.102433	0.0158266	0.333869	0.0447309	0.0526228	0.0482476	0.0256132	0.220742	0.254918	0.216349	0.313641	0.297932	0.577846
Oil %	0.453192	0.455048	0.502152	0.696835	0.352224	0.153982	0.184956	0.299444	0.0997305	0.439684	0.442873	0.448444	0.464466	0.610799	1	0.0199837	0.137031	0.107687	0.277643	0.132644	0.0621961	0.105956	0.22386	0.0896552	0.475005	0.393406	0.511381	0.462188	0.428998
Satrch %	0.211328	0.226372	0.514077	0.0538936	0.424794	0.4829	0.288694	0.313496	0.401999	0.525719	0.0889983	0.51148	0.448584	0.0549868	0.0199837	1	0.202212	0.164561	0.229023	0.405002	0.458902	0.4299	0.330804	0.522059	0.305806	0.308863	0.440069	0.322265	0.478116
Tr	0.0481066	0.0278454	0.294888	0.348791	0.676194	0.661958	0.449373	0.482741	0.560528	0.777448	0.529424	0.688856	0.618344	0.102433	0.137031	0.202212	1	0.934654	0.590532	0.815389	0.699847	0.776904	0.219769	0.540149	0.7827	0.840787	0.761015	0.810386	0.148358
Ci	0.00333786	0.0228973	0.202539	0.323845	0.616526	0.59696	0.437908	0.423668	0.581904	0.763241	0.481583	0.733062	0.683936	0.0158266	0.107687	0.164561	0.934654	1	0.440221	0.839651	0.740382	0.807816	0.167899	0.562258	0.655388	0.803272	0.663532	0.753906	0.20452
WUE	0.0722558	0.093492	0.138165	0.00163627	0.237781	0.264166	0.0336283	0.379097	0.246976	0.0866799	0.308787	0.149657	0.108279	0.333869	0.277643	0.229023	0.590532	0.440221	1	0.201013	0.0766618	0.153611	0.430283	0.0635524	0.482831	0.369386	0.294273	0.451329	0.420955
Chl a	0.191589	0.173774	0.486848	0.337324	0.530893	0.671602	0.670068	0.40549	0.62892	0.86317	0.359004	0.858259	0.843608	0.0447309	0.132644	0.405002	0.815389	0.839651	0.201013	1	0.963382	0.994361	0.128087	0.836472	0.566018	0.674489	0.652664	0.624578	0.483513
Chl b	0.204435	0.187011	0.451496	0.268221	0.40986	0.592874	0.725134	0.371814	0.665765	0.793584	0.302837	0.831627	0.809308	0.0526228	0.0621961	0.458902	0.699847	0.740382	0.0766618	0.963382	1	0.986384	0.38696	0.83868	0.452082	0.532419	0.54812	0.487171	0.489349
Chl a+b	0.198364	0.180546	0.477172	0.312978	0.487721	0.646405	0.697772	0.395757	0.649054	0.843283	0.339965	0.855316	0.837503	0.0482476	0.105956	0.4299	0.776904	0.807816	0.153611	0.994361	0.986384	1	0.231602	0.844743	0.525963	0.624266	0.617089	0.575758	0.490097
Chl (a/b)	0.0949601	0.0933168	0.0565659	0.163375	0.268385	0.143745	0.392342	0.0429483	0.287357	0.0246655	0.12803	0.136531	0.0960335	0.0256132	0.22386	0.330804	0.219769	0.167899	0.430283	0.128087	0.38696	0.231602	1	0.241558	0.276051	0.33866	0.198851	0.349302	0.188815
Carotinionds	0.532151	0.523504	0.631498	0.3533	0.509747	0.623351	0.51935	0.412383	0.533481	0.754926	0.118517	0.723444	0.726192	0.220742	0.0896552	0.522059	0.540149	0.562258	0.0635524	0.836472	0.83868	0.844743	0.241558	1	0.524904	0.540259	0.604293	0.552979	0.699788
Proline	0.50415	0.494043	0.518846	0.621622	0.782301	0.589779	0.288203	0.630908	0.498661	0.742844	0.557547	0.588973	0.538403	0.254918	0.475005	0.305806	0.7827	0.655388	0.482831	0.566018	0.452082	0.525963	0.276051	0.524904	1	0.819033	0.914386	0.936432	0.296575
H2O2	0.308083	0.296295	0.487673	0.536213	0.84573	0.59497	0.366004	0.625446	0.545163	0.855904	0.602306	0.730099	0.731442	0.216349	0.393406	0.308863	0.840787	0.803272	0.369386	0.674489	0.532419	0.624266	0.33866	0.540259	0.819033	1	0.921432	0.909069	0.447075
MDA	0.527071	0.519417	0.660694	0.668251	0.848457	0.593886	0.422328	0.660529	0.574578	0.877153	0.633655	0.738506	0.740882	0.313641	0.511381	0.440069	0.761015	0.663532	0.294273	0.652664	0.54812	0.617089	0.198851	0.604293	0.914386	0.921432	1	0.920154	0.535652
T-SOD	0.382423	0.370269	0.559529	0.612716	0.786731	0.641489	0.303619	0.682743	0.541547	0.789062	0.548433	0.653429	0.657442	0.297932	0.462188	0.322265	0.810386	0.753906	0.451329	0.624578	0.487171	0.575758	0.349302	0.552979	0.936432	0.909069	0.920154	1	0.394671
CAT	0.565577	0.569008	0.821096	0.553975	0.381877	0.376768	0.43258	0.373135	0.36813	0.640696	0.213223	0.681307	0.701872	0.577846	0.428998	0.478116	0.148358	0.20452	0.420955	0.483513	0.489349	0.490097	0.188815	0.699788	0.296575	0.447075	0.535652	0.394671	1

## Sheet: Correlation tests_HID2
74.0833	74.0833		77.0833	74.0833		178.267	74.0833		96.4667	74.0833		18.9333	74.0833		49.9167	74.0833		17.5167	74.0833		39.9333	74.0833		699.437	74.0833		9695.3	74.0833		288.8	74.0833		31.8	74.0833		36.3333	74.0833		14.1167	74.0833		5.13333	74.0833		49.3167	74.0833		3.1	74.0833
70.8333	70.8333		73.6333	70.8333		184.65	70.8333		94.15	70.8333		18.95	70.8333		46.995	70.8333		17.5167	70.8333		39.7167	70.8333		695.885	70.8333		9671.01	70.8333		343.15	70.8333		31.1167	70.8333		36.8167	70.8333		14.25	70.8333		4.63333	70.8333		49.9	70.8333		3.25	70.8333
71.7667	71.7667		74.6	71.7667		211.65	71.7667		104.483	71.7667		19.8667	71.7667		47.27	71.7667		18	71.7667		39.1	71.7667		606.72	71.7667		8118.71	71.7667		361.4	71.7667		28.05	71.7667		31.55	71.7667		14.3	71.7667		5.4	71.7667		46.7667	71.7667		3	71.7667
72.8333	72.8333		75.7333	72.8333		194.983	72.8333		112.967	72.8333		18.65	72.8333		42.915	72.8333		15.8	72.8333		41.1	72.8333		629.497	72.8333		8269.11	72.8333		329.35	72.8333		24.9833	72.8333		28.05	72.8333		14.7667	72.8333		5.16667	72.8333		46.1	72.8333		2.9	72.8333
68.6667	68.6667		72.45	68.6667		201.333	68.6667		78.9833	68.6667		21.0833	68.6667		47.3217	68.6667		16.15	68.6667		38.9667	68.6667		629.59	68.6667		8871.88	68.6667		260.45	68.6667		26.8833	68.6667		27.9167	68.6667		13.0833	68.6667		4.88333	68.6667		51.8667	68.6667		2.8	68.6667
72.9833	72.9833		76.0333	72.9833		170.35	72.9833		90.65	72.9833		18.15	72.9833		45.6933	72.9833		16	72.9833		38.1667	72.9833		610.667	72.9833		6489.59	72.9833		258.3	72.9833		20.7667	72.9833		19.8667	72.9833		13.5	72.9833		4.13333	72.9833		46.1	72.9833		2.6	72.9833
73.15	73.15		76.1	73.15		157.6	73.15		75.4833	73.15		17.9167	73.15		44.2117	73.15		16.8167	73.15		37.3667	73.15		628.366	73.15		6469.67	73.15		315.45	73.15		20.1333	73.15		21.1667	73.15		13.4333	73.15		4.25	73.15		44.9667	73.15		2.6	73.15
73.0833	73.0833		76.0333	73.0833		162.45	73.0833		77.4833	73.0833		17.2833	73.0833		44.845	73.0833		17.2	73.0833		36.8833	73.0833		577.217	73.0833		6317.15	73.0833		322.2	73.0833		19.3167	73.0833		21.2	73.0833		13.5333	73.0833		5.05	73.0833		46.7333	73.0833		2.25	73.0833
73.9167	73.9167		77.0167	73.9167		164.55	73.9167		94.9333	73.9167		18.7833	73.9167		40.345	73.9167		15	73.9167		38.9167	73.9167		584.167	73.9167		5619.45	73.9167		310.15	73.9167		16.4667	73.9167		22.45	73.9167		13.9167	73.9167		4.81667	73.9167		46.3667	73.9167		2.1	73.9167
69.8833	69.8833		73.0333	69.8833		174.15	69.8833		67.4667	69.8833		17.6667	69.8833		46.9883	69.8833		14.6833	69.8833		37.6	69.8833		552.087	69.8833		6098.78	69.8833		227.2	69.8833		18.2833	69.8833		19.5667	69.8833		12.6	69.8833		3.88333	69.8833		50.6667	69.8833		2.3	69.8833
61.7667	61.7667		64.6	61.7667		164.65	61.7667		71.2667	61.7667		18.2167	61.7667		46.3033	61.7667		17.2167	61.7667		40.2167	61.7667		692.188	61.7667		8214	61.7667		283.967	61.7667		24.4333	61.7667		25.4	61.7667		12.2833	61.7667		4.46667	61.7667		47.8	61.7667		3.55	61.7667
62.8167	62.8167		65.8167	62.8167		167.733	62.8167		78.2167	62.8167		19.4833	62.8167		45.25	62.8167		17.9	62.8167		34.4833	62.8167		617.27	62.8167		7965	62.8167		331.367	62.8167		27.05	62.8167		30.05	62.8167		11.9167	62.8167		4.2	62.8167		47.75	62.8167		3.6	62.8167
60.4833	60.4833		63.4833	60.4833		150.817	60.4833		74.1667	60.4833		18.9	60.4833		45.65	60.4833		17.1	60.4833		42.1667	60.4833		741.833	60.4833		6795	60.4833		353.8	60.4833		22	60.4833		21.8	60.4833		12.9	60.4833		4.3	60.4833		47.9667	60.4833		3.2	60.4833
64.1667	64.1667		67.1667	64.1667		139.783	64.1667		85.8333	64.1667		18.5833	64.1667		46.4533	64.1667		14.05	64.1667		38.5333	64.1667		541.053	64.1667		6844	64.1667		326.783	64.1667		20.4	64.1667		23.2833	64.1667		13.5	64.1667		4.76667	64.1667		43.9833	64.1667		3.15	64.1667
62.1667	62.1667		65.1667	62.1667		162.083	62.1667		82.6	62.1667		19.5833	62.1667		46.35	62.1667		14.5833	62.1667		33.1667	62.1667		483.25	62.1667		7067.4	62.1667		257.343	62.1667		22.2167	62.1667		23	62.1667		12.1833	62.1667		4.4	62.1667		45.4333	62.1667		3.4	62.1667
60.3333	60.3333		63.3333	60.3333		160.2	60.3333		70.3	60.3333		15.3333	60.3333		44.4	60.3333		16.1833	60.3333		34	60.3333		565.333	60.3333		4312.88	60.3333		226.24	60.3333		17.8667	60.3333		19.15	60.3333		13.4333	60.3333		4.31667	60.3333		45.95	60.3333		2.05	60.3333
61.3333	61.3333		64.3333	61.3333		155.3	61.3333		69	61.3333		17	61.3333		42.3	61.3333		16.65	61.3333		36.1833	61.3333		614	61.3333		5862.87	61.3333		255.54	61.3333		19.5333	61.3333		25.7	61.3333		13.45	61.3333		4.05	61.3333		46.1333	61.3333		2	61.3333
59.6667	59.6667		63	59.6667		164.683	59.6667		78	59.6667		15.3333	59.6667		43.9833	59.6667		16	59.6667		35.3333	59.6667		536	59.6667		5675.69	59.6667		310.867	59.6667		18.5333	59.6667		18.7833	59.6667		12.6333	59.6667		4.55	59.6667		45.6667	59.6667		2	59.6667
62.8167	62.8167		66.3333	62.8167		137.3	62.8167		72	62.8167		17.5	62.8167		40.4	62.8167		13.8	62.8167		29	62.8167		444	62.8167		4962	62.8167		231.943	62.8167		20.4667	62.8167		17.2667	62.8167		13.3833	62.8167		4.6	62.8167		46.4	62.8167		1.75	62.8167
62.3333	62.3333		65.6667	62.3333		157.55	62.3333		65.85	62.3333		17.1833	62.3333		42.5	62.3333		14.35	62.3333		34.5	62.3333		432.3	62.3333		5209.15	62.3333		192.763	62.3333		19.5333	62.3333		20.45	62.3333		12.2667	62.3333		4.5	62.3333		46.75	62.3333		2	62.3333

## Sheet: Correlation tests_HID3
4.315	178.267		1.63136	178.267		1.945	178.267		7.65	178.267		2.35	178.267		120.5	178.267		37.5	178.267		9.85	178.267		74.0833	96.4667		77.0833	96.4667		178.267	96.4667		96.4667	96.4667		18.9333	96.4667		49.9167	96.4667		17.5167	96.4667		39.9333	96.4667		699.437	96.4667
4.475	184.65		1.65613	184.65		1.965	184.65		7.65	184.65		2.15	184.65		122	184.65		37.5	184.65		10.25	184.65		70.8333	94.15		73.6333	94.15		184.65	94.15		94.15	94.15		18.95	94.15		46.995	94.15		17.5167	94.15		39.7167	94.15		695.885	94.15
3.675	211.65		1.73231	211.65		1.73	211.65		6.35	211.65		1.9	211.65		117	211.65		33.5	211.65		10.15	211.65		71.7667	104.483		74.6	104.483		211.65	104.483		104.483	104.483		19.8667	104.483		47.27	104.483		18	104.483		39.1	104.483		606.72	104.483
3.51	194.983		1.76376	194.983		1.705	194.983		5.9	194.983		2.05	194.983		116.5	194.983		34.5	194.983		10.05	194.983		72.8333	112.967		75.7333	112.967		194.983	112.967		112.967	112.967		18.65	112.967		42.915	112.967		15.8	112.967		41.1	112.967		629.497	112.967
3.64	201.333		1.80011	201.333		1.83	201.333		6.85	201.333		2.15	201.333		118	201.333		35.5	201.333		10	201.333		68.6667	78.9833		72.45	78.9833		201.333	78.9833		78.9833	78.9833		21.0833	78.9833		47.3217	78.9833		16.15	78.9833		38.9667	78.9833		629.59	78.9833
3.48	170.35		1.70562	170.35		1.75	170.35		11.55	170.35		4.3	170.35		162.5	170.35		49.5	170.35		7.65	170.35		72.9833	90.65		76.0333	90.65		170.35	90.65		90.65	90.65		18.15	90.65		45.6933	90.65		16	90.65		38.1667	90.65		610.667	90.65
3.515	157.6		1.66093	157.6		1.83	157.6		12.55	157.6		3.4	157.6		152.5	157.6		48	157.6		8.55	157.6		73.15	75.4833		76.1	75.4833		157.6	75.4833		75.4833	75.4833		17.9167	75.4833		44.2117	75.4833		16.8167	75.4833		37.3667	75.4833		628.366	75.4833
3.075	162.45		1.77021	162.45		1.495	162.45		11.3	162.45		4.05	162.45		151.5	162.45		50.5	162.45		6.9	162.45		73.0833	77.4833		76.0333	77.4833		162.45	77.4833		77.4833	77.4833		17.2833	77.4833		44.845	77.4833		17.2	77.4833		36.8833	77.4833		577.217	77.4833
2.87	164.55		1.69497	164.55		1.5	164.55		9.95	164.55		4.1	164.55		144.5	164.55		45	164.55		6.45	164.55		73.9167	94.9333		77.0167	94.9333		164.55	94.9333		94.9333	94.9333		18.7833	94.9333		40.345	94.9333		15	94.9333		38.9167	94.9333		584.167	94.9333
3.11	174.15		1.6835	174.15		1.71	174.15		12.25	174.15		3.75	174.15		148.5	174.15		45	174.15		7.95	174.15		69.8833	67.4667		73.0333	67.4667		174.15	67.4667		67.4667	67.4667		17.6667	67.4667		46.9883	67.4667		14.6833	67.4667		37.6	67.4667		552.087	67.4667
4.2	164.65		1.65761	164.65		1.755	164.65		8.1	164.65		2.9	164.65		145.5	164.65		39.5	164.65		6.15	164.65		61.7667	71.2667		64.6	71.2667		164.65	71.2667		71.2667	71.2667		18.2167	71.2667		46.3033	71.2667		17.2167	71.2667		40.2167	71.2667		692.188	71.2667
4.34	167.733		1.67901	167.733		1.76	167.733		9.9	167.733		2.55	167.733		130.5	167.733		42.5	167.733		7.3	167.733		62.8167	78.2167		65.8167	78.2167		167.733	78.2167		78.2167	78.2167		19.4833	78.2167		45.25	78.2167		17.9	78.2167		34.4833	78.2167		617.27	78.2167
3.23	150.817		1.69549	150.817		1.415	150.817		8.6	150.817		2.4	150.817		136.5	150.817		40	150.817		6.3	150.817		60.4833	74.1667		63.4833	74.1667		150.817	74.1667		74.1667	74.1667		18.9	74.1667		45.65	74.1667		17.1	74.1667		42.1667	74.1667		741.833	74.1667
3.11	139.783		1.96773	139.783		1.45	139.783		8.1	139.783		2.1	139.783		143	139.783		34.5	139.783		6	139.783		64.1667	85.8333		67.1667	85.8333		139.783	85.8333		85.8333	85.8333		18.5833	85.8333		46.4533	85.8333		14.05	85.8333		38.5333	85.8333		541.053	85.8333
3.525	162.083		1.86575	162.083		1.645	162.083		8	162.083		2.55	162.083		138	162.083		40.5	162.083		6.5	162.083		62.1667	82.6		65.1667	82.6		162.083	82.6		82.6	82.6		19.5833	82.6		46.35	82.6		14.5833	82.6		33.1667	82.6		483.25	82.6
3.225	160.2		1.68287	160.2		1.58	160.2		17.6	160.2		5.8	160.2		193	160.2		52	160.2		6.9	160.2		60.3333	70.3		63.3333	70.3		160.2	70.3		70.3	70.3		15.3333	70.3		44.4	70.3		16.1833	70.3		34	70.3		565.333	70.3
3.315	155.3		1.71201	155.3		1.565	155.3		24.8	155.3		4	155.3		183	155.3		58	155.3		8.15	155.3		61.3333	69		64.3333	69		155.3	69		69	69		17	69		42.3	69		16.65	69		36.1833	69		614	69
2.925	164.683		1.70872	164.683		1.335	164.683		20.55	164.683		5.25	164.683		179.5	164.683		59.5	164.683		7.25	164.683		59.6667	78		63	78		164.683	78		78	78		15.3333	78		43.9833	78		16	78		35.3333	78		536	78
2.67	137.3		1.64314	137.3		1.34	137.3		19.2	137.3		5.1	137.3		185.5	137.3		59.5	137.3		6.6	137.3		62.8167	72		66.3333	72		137.3	72		72	72		17.5	72		40.4	72		13.8	72		29	72		444	72
3.0335	157.55		1.7008	157.55		1.535	157.55		19.2	157.55		4.65	157.55		183.5	157.55		56.5	157.55		7.4	157.55		62.3333	65.85		65.6667	65.85		157.55	65.85		65.85	65.85		17.1833	65.85		42.5	65.85		14.35	65.85		34.5	65.85		432.3	65.85

## Sheet: Correlation tests_HID4
14.1167	49.9167		5.13333	49.9167		49.3167	49.9167		3.1	49.9167		273.5	49.9167		10.2604	49.9167		2.675	49.9167		1.64	49.9167		4.315	49.9167		1.63136	49.9167		1.945	49.9167		7.65	49.9167		2.35	49.9167		120.5	49.9167		37.5	49.9167		9.85	49.9167		74.0833	17.5167
14.25	46.995		4.63333	46.995		49.9	46.995		3.25	46.995		290.5	46.995		9.57292	46.995		2.79	46.995		1.685	46.995		4.475	46.995		1.65613	46.995		1.965	46.995		7.65	46.995		2.15	46.995		122	46.995		37.5	46.995		10.25	46.995		70.8333	17.5167
14.3	47.27		5.4	47.27		46.7667	47.27		3	47.27		239.5	47.27		9.35714	47.27		2.33	47.27		1.345	47.27		3.675	47.27		1.73231	47.27		1.73	47.27		6.35	47.27		1.9	47.27		117	47.27		33.5	47.27		10.15	47.27		71.7667	18
14.7667	42.915		5.16667	42.915		46.1	42.915		2.9	42.915		239	42.915		8.62465	42.915		2.24	42.915		1.27	42.915		3.51	42.915		1.76376	42.915		1.705	42.915		5.9	42.915		2.05	42.915		116.5	42.915		34.5	42.915		10.05	42.915		72.8333	15.8
13.0833	47.3217		4.88333	47.3217		51.8667	47.3217		2.8	47.3217		234	47.3217		9.60119	47.3217		2.34	47.3217		1.3	47.3217		3.64	47.3217		1.80011	47.3217		1.83	47.3217		6.85	47.3217		2.15	47.3217		118	47.3217		35.5	47.3217		10	47.3217		68.6667	16.15
13.5	45.6933		4.13333	45.6933		46.1	45.6933		2.6	45.6933		209.5	45.6933		7.98551	45.6933		2.19	45.6933		1.29	45.6933		3.48	45.6933		1.70562	45.6933		1.75	45.6933		11.55	45.6933		4.3	45.6933		162.5	45.6933		49.5	45.6933		7.65	45.6933		72.9833	16
13.4333	44.2117		4.25	44.2117		44.9667	44.2117		2.6	44.2117		223	44.2117		7.64718	44.2117		2.195	44.2117		1.32	44.2117		3.515	44.2117		1.66093	44.2117		1.83	44.2117		12.55	44.2117		3.4	44.2117		152.5	44.2117		48	44.2117		8.55	44.2117		73.15	16.8167
13.5333	44.845		5.05	44.845		46.7333	44.845		2.25	44.845		151.5	44.845		8.85185	44.845		1.965	44.845		1.11	44.845		3.075	44.845		1.77021	44.845		1.495	44.845		11.3	44.845		4.05	44.845		151.5	44.845		50.5	44.845		6.9	44.845		73.0833	17.2
13.9167	40.345		4.81667	40.345		46.3667	40.345		2.1	40.345		157	40.345		8.05609	40.345		1.805	40.345		1.065	40.345		2.87	40.345		1.69497	40.345		1.5	40.345		9.95	40.345		4.1	40.345		144.5	40.345		45	40.345		6.45	40.345		73.9167	15
12.6	46.9883		3.88333	46.9883		50.6667	46.9883		2.3	46.9883		164.5	46.9883		8.02444	46.9883		1.95	46.9883		1.16	46.9883		3.11	46.9883		1.6835	46.9883		1.71	46.9883		12.25	46.9883		3.75	46.9883		148.5	46.9883		45	46.9883		7.95	46.9883		69.8833	14.6833
12.2833	46.3033		4.46667	46.3033		47.8	46.3033		3.55	46.3033		294	46.3033		6.87116	46.3033		2.62	46.3033		1.58	46.3033		4.2	46.3033		1.65761	46.3033		1.755	46.3033		8.1	46.3033		2.9	46.3033		145.5	46.3033		39.5	46.3033		6.15	46.3033		61.7667	17.2167
11.9167	45.25		4.2	45.25		47.75	45.25		3.6	45.25		309	45.25		7.51389	45.25		2.72	45.25		1.62	45.25		4.34	45.25		1.67901	45.25		1.76	45.25		9.9	45.25		2.55	45.25		130.5	45.25		42.5	45.25		7.3	45.25		62.8167	17.9
12.9	45.65		4.3	45.65		47.9667	45.65		3.2	45.65		254.5	45.65		6.89216	45.65		2.03	45.65		1.2	45.65		3.23	45.65		1.69549	45.65		1.415	45.65		8.6	45.65		2.4	45.65		136.5	45.65		40	45.65		6.3	45.65		60.4833	17.1
13.5	46.4533		4.76667	46.4533		43.9833	46.4533		3.15	46.4533		291.5	46.4533		6.48929	46.4533		2.06	46.4533		1.05	46.4533		3.11	46.4533		1.96773	46.4533		1.45	46.4533		8.1	46.4533		2.1	46.4533		143	46.4533		34.5	46.4533		6	46.4533		64.1667	14.05
12.1833	46.35		4.4	46.35		45.4333	46.35		3.4	46.35		251	46.35		6.53431	46.35		2.295	46.35		1.23	46.35		3.525	46.35		1.86575	46.35		1.645	46.35		8	46.35		2.55	46.35		138	46.35		40.5	46.35		6.5	46.35		62.1667	14.5833
13.4333	44.4		4.31667	44.4		45.95	44.4		2.05	44.4		185	44.4		8.84702	44.4		2.02	44.4		1.205	44.4		3.225	44.4		1.68287	44.4		1.58	44.4		17.6	44.4		5.8	44.4		193	44.4		52	44.4		6.9	44.4		60.3333	16.1833
13.45	42.3		4.05	42.3		46.1333	42.3		2	42.3		194	42.3		9.99147	42.3		2.095	42.3		1.22	42.3		3.315	42.3		1.71201	42.3		1.565	42.3		24.8	42.3		4	42.3		183	42.3		58	42.3		8.15	42.3		61.3333	16.65
12.6333	43.9833		4.55	43.9833		45.6667	43.9833		2	43.9833		142	43.9833		9.65278	43.9833		1.845	43.9833		1.08	43.9833		2.925	43.9833		1.70872	43.9833		1.335	43.9833		20.55	43.9833		5.25	43.9833		179.5	43.9833		59.5	43.9833		7.25	43.9833		59.6667	16
13.3833	40.4		4.6	40.4		46.4	40.4		1.75	40.4		164	40.4		12.0556	40.4		1.66	40.4		1.01	40.4		2.67	40.4		1.64314	40.4		1.34	40.4		19.2	40.4		5.1	40.4		185.5	40.4		59.5	40.4		6.6	40.4		62.8167	13.8
12.2667	42.5		4.5	42.5		46.75	42.5		2	42.5		153.5	42.5		9.79114	42.5		1.91	42.5		1.1235	42.5		3.0335	42.5		1.7008	42.5		1.535	42.5		19.2	42.5		4.65	42.5		183.5	42.5		56.5	42.5		7.4	42.5		62.3333	14.35

## Sheet: Correlation tests_HID5
49.9167	699.437		17.5167	699.437		39.9333	699.437		699.437	699.437		9695.3	699.437		288.8	699.437		31.8	699.437		36.3333	699.437		14.1167	699.437		5.13333	699.437		49.3167	699.437		3.1	699.437		273.5	699.437		10.2604	699.437		2.675	699.437		1.64	699.437		4.315	699.437
46.995	695.885		17.5167	695.885		39.7167	695.885		695.885	695.885		9671.01	695.885		343.15	695.885		31.1167	695.885		36.8167	695.885		14.25	695.885		4.63333	695.885		49.9	695.885		3.25	695.885		290.5	695.885		9.57292	695.885		2.79	695.885		1.685	695.885		4.475	695.885
47.27	606.72		18	606.72		39.1	606.72		606.72	606.72		8118.71	606.72		361.4	606.72		28.05	606.72		31.55	606.72		14.3	606.72		5.4	606.72		46.7667	606.72		3	606.72		239.5	606.72		9.35714	606.72		2.33	606.72		1.345	606.72		3.675	606.72
42.915	629.497		15.8	629.497		41.1	629.497		629.497	629.497		8269.11	629.497		329.35	629.497		24.9833	629.497		28.05	629.497		14.7667	629.497		5.16667	629.497		46.1	629.497		2.9	629.497		239	629.497		8.62465	629.497		2.24	629.497		1.27	629.497		3.51	629.497
47.3217	629.59		16.15	629.59		38.9667	629.59		629.59	629.59		8871.88	629.59		260.45	629.59		26.8833	629.59		27.9167	629.59		13.0833	629.59		4.88333	629.59		51.8667	629.59		2.8	629.59		234	629.59		9.60119	629.59		2.34	629.59		1.3	629.59		3.64	629.59
45.6933	610.667		16	610.667		38.1667	610.667		610.667	610.667		6489.59	610.667		258.3	610.667		20.7667	610.667		19.8667	610.667		13.5	610.667		4.13333	610.667		46.1	610.667		2.6	610.667		209.5	610.667		7.98551	610.667		2.19	610.667		1.29	610.667		3.48	610.667
44.2117	628.366		16.8167	628.366		37.3667	628.366		628.366	628.366		6469.67	628.366		315.45	628.366		20.1333	628.366		21.1667	628.366		13.4333	628.366		4.25	628.366		44.9667	628.366		2.6	628.366		223	628.366		7.64718	628.366		2.195	628.366		1.32	628.366		3.515	628.366
44.845	577.217		17.2	577.217		36.8833	577.217		577.217	577.217		6317.15	577.217		322.2	577.217		19.3167	577.217		21.2	577.217		13.5333	577.217		5.05	577.217		46.7333	577.217		2.25	577.217		151.5	577.217		8.85185	577.217		1.965	577.217		1.11	577.217		3.075	577.217
40.345	584.167		15	584.167		38.9167	584.167		584.167	584.167		5619.45	584.167		310.15	584.167		16.4667	584.167		22.45	584.167		13.9167	584.167		4.81667	584.167		46.3667	584.167		2.1	584.167		157	584.167		8.05609	584.167		1.805	584.167		1.065	584.167		2.87	584.167
46.9883	552.087		14.6833	552.087		37.6	552.087		552.087	552.087		6098.78	552.087		227.2	552.087		18.2833	552.087		19.5667	552.087		12.6	552.087		3.88333	552.087		50.6667	552.087		2.3	552.087		164.5	552.087		8.02444	552.087		1.95	552.087		1.16	552.087		3.11	552.087
46.3033	692.188		17.2167	692.188		40.2167	692.188		692.188	692.188		8214	692.188		283.967	692.188		24.4333	692.188		25.4	692.188		12.2833	692.188		4.46667	692.188		47.8	692.188		3.55	692.188		294	692.188		6.87116	692.188		2.62	692.188		1.58	692.188		4.2	692.188
45.25	617.27		17.9	617.27		34.4833	617.27		617.27	617.27		7965	617.27		331.367	617.27		27.05	617.27		30.05	617.27		11.9167	617.27		4.2	617.27		47.75	617.27		3.6	617.27		309	617.27		7.51389	617.27		2.72	617.27		1.62	617.27		4.34	617.27
45.65	741.833		17.1	741.833		42.1667	741.833		741.833	741.833		6795	741.833		353.8	741.833		22	741.833		21.8	741.833		12.9	741.833		4.3	741.833		47.9667	741.833		3.2	741.833		254.5	741.833		6.89216	741.833		2.03	741.833		1.2	741.833		3.23	741.833
46.4533	541.053		14.05	541.053		38.5333	541.053		541.053	541.053		6844	541.053		326.783	541.053		20.4	541.053		23.2833	541.053		13.5	541.053		4.76667	541.053		43.9833	541.053		3.15	541.053		291.5	541.053		6.48929	541.053		2.06	541.053		1.05	541.053		3.11	541.053
46.35	483.25		14.5833	483.25		33.1667	483.25		483.25	483.25		7067.4	483.25		257.343	483.25		22.2167	483.25		23	483.25		12.1833	483.25		4.4	483.25		45.4333	483.25		3.4	483.25		251	483.25		6.53431	483.25		2.295	483.25		1.23	483.25		3.525	483.25
44.4	565.333		16.1833	565.333		34	565.333		565.333	565.333		4312.88	565.333		226.24	565.333		17.8667	565.333		19.15	565.333		13.4333	565.333		4.31667	565.333		45.95	565.333		2.05	565.333		185	565.333		8.84702	565.333		2.02	565.333		1.205	565.333		3.225	565.333
42.3	614		16.65	614		36.1833	614		614	614		5862.87	614		255.54	614		19.5333	614		25.7	614		13.45	614		4.05	614		46.1333	614		2	614		194	614		9.99147	614		2.095	614		1.22	614		3.315	614
43.9833	536		16	536		35.3333	536		536	536		5675.69	536		310.867	536		18.5333	536		18.7833	536		12.6333	536		4.55	536		45.6667	536		2	536		142	536		9.65278	536		1.845	536		1.08	536		2.925	536
40.4	444		13.8	444		29	444		444	444		4962	444		231.943	444		20.4667	444		17.2667	444		13.3833	444		4.6	444		46.4	444		1.75	444		164	444		12.0556	444		1.66	444		1.01	444		2.67	444
42.5	432.3		14.35	432.3		34.5	432.3		432.3	432.3		5209.15	432.3		192.763	432.3		19.5333	432.3		20.45	432.3		12.2667	432.3		4.5	432.3		46.75	432.3		2	432.3		153.5	432.3		9.79114	432.3		1.91	432.3		1.1235	432.3		3.0335	432.3

## Sheet: Correlation tests_HID6
120.5	288.8		37.5	288.8		9.85	288.8		74.0833	31.8		77.0833	31.8		178.267	31.8		96.4667	31.8		18.9333	31.8		49.9167	31.8		17.5167	31.8		39.9333	31.8		699.437	31.8		9695.3	31.8		288.8	31.8		31.8	31.8		36.3333	31.8		14.1167	31.8
122	343.15		37.5	343.15		10.25	343.15		70.8333	31.1167		73.6333	31.1167		184.65	31.1167		94.15	31.1167		18.95	31.1167		46.995	31.1167		17.5167	31.1167		39.7167	31.1167		695.885	31.1167		9671.01	31.1167		343.15	31.1167		31.1167	31.1167		36.8167	31.1167		14.25	31.1167
117	361.4		33.5	361.4		10.15	361.4		71.7667	28.05		74.6	28.05		211.65	28.05		104.483	28.05		19.8667	28.05		47.27	28.05		18	28.05		39.1	28.05		606.72	28.05		8118.71	28.05		361.4	28.05		28.05	28.05		31.55	28.05		14.3	28.05
116.5	329.35		34.5	329.35		10.05	329.35		72.8333	24.9833		75.7333	24.9833		194.983	24.9833		112.967	24.9833		18.65	24.9833		42.915	24.9833		15.8	24.9833		41.1	24.9833		629.497	24.9833		8269.11	24.9833		329.35	24.9833		24.9833	24.9833		28.05	24.9833		14.7667	24.9833
118	260.45		35.5	260.45		10	260.45		68.6667	26.8833		72.45	26.8833		201.333	26.8833		78.9833	26.8833		21.0833	26.8833		47.3217	26.8833		16.15	26.8833		38.9667	26.8833		629.59	26.8833		8871.88	26.8833		260.45	26.8833		26.8833	26.8833		27.9167	26.8833		13.0833	26.8833
162.5	258.3		49.5	258.3		7.65	258.3		72.9833	20.7667		76.0333	20.7667		170.35	20.7667		90.65	20.7667		18.15	20.7667		45.6933	20.7667		16	20.7667		38.1667	20.7667		610.667	20.7667		6489.59	20.7667		258.3	20.7667		20.7667	20.7667		19.8667	20.7667		13.5	20.7667
152.5	315.45		48	315.45		8.55	315.45		73.15	20.1333		76.1	20.1333		157.6	20.1333		75.4833	20.1333		17.9167	20.1333		44.2117	20.1333		16.8167	20.1333		37.3667	20.1333		628.366	20.1333		6469.67	20.1333		315.45	20.1333		20.1333	20.1333		21.1667	20.1333		13.4333	20.1333
151.5	322.2		50.5	322.2		6.9	322.2		73.0833	19.3167		76.0333	19.3167		162.45	19.3167		77.4833	19.3167		17.2833	19.3167		44.845	19.3167		17.2	19.3167		36.8833	19.3167		577.217	19.3167		6317.15	19.3167		322.2	19.3167		19.3167	19.3167		21.2	19.3167		13.5333	19.3167
144.5	310.15		45	310.15		6.45	310.15		73.9167	16.4667		77.0167	16.4667		164.55	16.4667		94.9333	16.4667		18.7833	16.4667		40.345	16.4667		15	16.4667		38.9167	16.4667		584.167	16.4667		5619.45	16.4667		310.15	16.4667		16.4667	16.4667		22.45	16.4667		13.9167	16.4667
148.5	227.2		45	227.2		7.95	227.2		69.8833	18.2833		73.0333	18.2833		174.15	18.2833		67.4667	18.2833		17.6667	18.2833		46.9883	18.2833		14.6833	18.2833		37.6	18.2833		552.087	18.2833		6098.78	18.2833		227.2	18.2833		18.2833	18.2833		19.5667	18.2833		12.6	18.2833
145.5	283.967		39.5	283.967		6.15	283.967		61.7667	24.4333		64.6	24.4333		164.65	24.4333		71.2667	24.4333		18.2167	24.4333		46.3033	24.4333		17.2167	24.4333		40.2167	24.4333		692.188	24.4333		8214	24.4333		283.967	24.4333		24.4333	24.4333		25.4	24.4333		12.2833	24.4333
130.5	331.367		42.5	331.367		7.3	331.367		62.8167	27.05		65.8167	27.05		167.733	27.05		78.2167	27.05		19.4833	27.05		45.25	27.05		17.9	27.05		34.4833	27.05		617.27	27.05		7965	27.05		331.367	27.05		27.05	27.05		30.05	27.05		11.9167	27.05
136.5	353.8		40	353.8		6.3	353.8		60.4833	22		63.4833	22		150.817	22		74.1667	22		18.9	22		45.65	22		17.1	22		42.1667	22		741.833	22		6795	22		353.8	22		22	22		21.8	22		12.9	22
143	326.783		34.5	326.783		6	326.783		64.1667	20.4		67.1667	20.4		139.783	20.4		85.8333	20.4		18.5833	20.4		46.4533	20.4		14.05	20.4		38.5333	20.4		541.053	20.4		6844	20.4		326.783	20.4		20.4	20.4		23.2833	20.4		13.5	20.4
138	257.343		40.5	257.343		6.5	257.343		62.1667	22.2167		65.1667	22.2167		162.083	22.2167		82.6	22.2167		19.5833	22.2167		46.35	22.2167		14.5833	22.2167		33.1667	22.2167		483.25	22.2167		7067.4	22.2167		257.343	22.2167		22.2167	22.2167		23	22.2167		12.1833	22.2167
193	226.24		52	226.24		6.9	226.24		60.3333	17.8667		63.3333	17.8667		160.2	17.8667		70.3	17.8667		15.3333	17.8667		44.4	17.8667		16.1833	17.8667		34	17.8667		565.333	17.8667		4312.88	17.8667		226.24	17.8667		17.8667	17.8667		19.15	17.8667		13.4333	17.8667
183	255.54		58	255.54		8.15	255.54		61.3333	19.5333		64.3333	19.5333		155.3	19.5333		69	19.5333		17	19.5333		42.3	19.5333		16.65	19.5333		36.1833	19.5333		614	19.5333		5862.87	19.5333		255.54	19.5333		19.5333	19.5333		25.7	19.5333		13.45	19.5333
179.5	310.867		59.5	310.867		7.25	310.867		59.6667	18.5333		63	18.5333		164.683	18.5333		78	18.5333		15.3333	18.5333		43.9833	18.5333		16	18.5333		35.3333	18.5333		536	18.5333		5675.69	18.5333		310.867	18.5333		18.5333	18.5333		18.7833	18.5333		12.6333	18.5333
185.5	231.943		59.5	231.943		6.6	231.943		62.8167	20.4667		66.3333	20.4667		137.3	20.4667		72	20.4667		17.5	20.4667		40.4	20.4667		13.8	20.4667		29	20.4667		444	20.4667		4962	20.4667		231.943	20.4667		20.4667	20.4667		17.2667	20.4667		13.3833	20.4667
183.5	192.763		56.5	192.763		7.4	192.763		62.3333	19.5333		65.6667	19.5333		157.55	19.5333		65.85	19.5333		17.1833	19.5333		42.5	19.5333		14.35	19.5333		34.5	19.5333		432.3	19.5333		5209.15	19.5333		192.763	19.5333		19.5333	19.5333		20.45	19.5333		12.2667	19.5333

## Sheet: Correlation tests_HID7
10.2604	14.1167		2.675	14.1167		1.64	14.1167		4.315	14.1167		1.63136	14.1167		1.945	14.1167		7.65	14.1167		2.35	14.1167		120.5	14.1167		37.5	14.1167		9.85	14.1167		74.0833	5.13333		77.0833	5.13333		178.267	5.13333		96.4667	5.13333		18.9333	5.13333		49.9167	5.13333
9.57292	14.25		2.79	14.25		1.685	14.25		4.475	14.25		1.65613	14.25		1.965	14.25		7.65	14.25		2.15	14.25		122	14.25		37.5	14.25		10.25	14.25		70.8333	4.63333		73.6333	4.63333		184.65	4.63333		94.15	4.63333		18.95	4.63333		46.995	4.63333
9.35714	14.3		2.33	14.3		1.345	14.3		3.675	14.3		1.73231	14.3		1.73	14.3		6.35	14.3		1.9	14.3		117	14.3		33.5	14.3		10.15	14.3		71.7667	5.4		74.6	5.4		211.65	5.4		104.483	5.4		19.8667	5.4		47.27	5.4
8.62465	14.7667		2.24	14.7667		1.27	14.7667		3.51	14.7667		1.76376	14.7667		1.705	14.7667		5.9	14.7667		2.05	14.7667		116.5	14.7667		34.5	14.7667		10.05	14.7667		72.8333	5.16667		75.7333	5.16667		194.983	5.16667		112.967	5.16667		18.65	5.16667		42.915	5.16667
9.60119	13.0833		2.34	13.0833		1.3	13.0833		3.64	13.0833		1.80011	13.0833		1.83	13.0833		6.85	13.0833		2.15	13.0833		118	13.0833		35.5	13.0833		10	13.0833		68.6667	4.88333		72.45	4.88333		201.333	4.88333		78.9833	4.88333		21.0833	4.88333		47.3217	4.88333
7.98551	13.5		2.19	13.5		1.29	13.5		3.48	13.5		1.70562	13.5		1.75	13.5		11.55	13.5		4.3	13.5		162.5	13.5		49.5	13.5		7.65	13.5		72.9833	4.13333		76.0333	4.13333		170.35	4.13333		90.65	4.13333		18.15	4.13333		45.6933	4.13333
7.64718	13.4333		2.195	13.4333		1.32	13.4333		3.515	13.4333		1.66093	13.4333		1.83	13.4333		12.55	13.4333		3.4	13.4333		152.5	13.4333		48	13.4333		8.55	13.4333		73.15	4.25		76.1	4.25		157.6	4.25		75.4833	4.25		17.9167	4.25		44.2117	4.25
8.85185	13.5333		1.965	13.5333		1.11	13.5333		3.075	13.5333		1.77021	13.5333		1.495	13.5333		11.3	13.5333		4.05	13.5333		151.5	13.5333		50.5	13.5333		6.9	13.5333		73.0833	5.05		76.0333	5.05		162.45	5.05		77.4833	5.05		17.2833	5.05		44.845	5.05
8.05609	13.9167		1.805	13.9167		1.065	13.9167		2.87	13.9167		1.69497	13.9167		1.5	13.9167		9.95	13.9167		4.1	13.9167		144.5	13.9167		45	13.9167		6.45	13.9167		73.9167	4.81667		77.0167	4.81667		164.55	4.81667		94.9333	4.81667		18.7833	4.81667		40.345	4.81667
8.02444	12.6		1.95	12.6		1.16	12.6		3.11	12.6		1.6835	12.6		1.71	12.6		12.25	12.6		3.75	12.6		148.5	12.6		45	12.6		7.95	12.6		69.8833	3.88333		73.0333	3.88333		174.15	3.88333		67.4667	3.88333		17.6667	3.88333		46.9883	3.88333
6.87116	12.2833		2.62	12.2833		1.58	12.2833		4.2	12.2833		1.65761	12.2833		1.755	12.2833		8.1	12.2833		2.9	12.2833		145.5	12.2833		39.5	12.2833		6.15	12.2833		61.7667	4.46667		64.6	4.46667		164.65	4.46667		71.2667	4.46667		18.2167	4.46667		46.3033	4.46667
7.51389	11.9167		2.72	11.9167		1.62	11.9167		4.34	11.9167		1.67901	11.9167		1.76	11.9167		9.9	11.9167		2.55	11.9167		130.5	11.9167		42.5	11.9167		7.3	11.9167		62.8167	4.2		65.8167	4.2		167.733	4.2		78.2167	4.2		19.4833	4.2		45.25	4.2
6.89216	12.9		2.03	12.9		1.2	12.9		3.23	12.9		1.69549	12.9		1.415	12.9		8.6	12.9		2.4	12.9		136.5	12.9		40	12.9		6.3	12.9		60.4833	4.3		63.4833	4.3		150.817	4.3		74.1667	4.3		18.9	4.3		45.65	4.3
6.48929	13.5		2.06	13.5		1.05	13.5		3.11	13.5		1.96773	13.5		1.45	13.5		8.1	13.5		2.1	13.5		143	13.5		34.5	13.5		6	13.5		64.1667	4.76667		67.1667	4.76667		139.783	4.76667		85.8333	4.76667		18.5833	4.76667		46.4533	4.76667
6.53431	12.1833		2.295	12.1833		1.23	12.1833		3.525	12.1833		1.86575	12.1833		1.645	12.1833		8	12.1833		2.55	12.1833		138	12.1833		40.5	12.1833		6.5	12.1833		62.1667	4.4		65.1667	4.4		162.083	4.4		82.6	4.4		19.5833	4.4		46.35	4.4
8.84702	13.4333		2.02	13.4333		1.205	13.4333		3.225	13.4333		1.68287	13.4333		1.58	13.4333		17.6	13.4333		5.8	13.4333		193	13.4333		52	13.4333		6.9	13.4333		60.3333	4.31667		63.3333	4.31667		160.2	4.31667		70.3	4.31667		15.3333	4.31667		44.4	4.31667
9.99147	13.45		2.095	13.45		1.22	13.45		3.315	13.45		1.71201	13.45		1.565	13.45		24.8	13.45		4	13.45		183	13.45		58	13.45		8.15	13.45		61.3333	4.05		64.3333	4.05		155.3	4.05		69	4.05		17	4.05		42.3	4.05
9.65278	12.6333		1.845	12.6333		1.08	12.6333		2.925	12.6333		1.70872	12.6333		1.335	12.6333		20.55	12.6333		5.25	12.6333		179.5	12.6333		59.5	12.6333		7.25	12.6333		59.6667	4.55		63	4.55		164.683	4.55		78	4.55		15.3333	4.55		43.9833	4.55
12.0556	13.3833		1.66	13.3833		1.01	13.3833		2.67	13.3833		1.64314	13.3833		1.34	13.3833		19.2	13.3833		5.1	13.3833		185.5	13.3833		59.5	13.3833		6.6	13.3833		62.8167	4.6		66.3333	4.6		137.3	4.6		72	4.6		17.5	4.6		40.4	4.6
9.79114	12.2667		1.91	12.2667		1.1235	12.2667		3.0335	12.2667		1.7008	12.2667		1.535	12.2667		19.2	12.2667		4.65	12.2667		183.5	12.2667		56.5	12.2667		7.4	12.2667		62.3333	4.5		65.6667	4.5		157.55	4.5		65.85	4.5		17.1833	4.5		42.5	4.5

[truncated: 52 more sheets: Correlation tests_HID8, Correlation tests_HID9, Correlation tests_HID10, Correlation tests_HID11, Correlation tests_HID12, _HID7, _HID5, _HID4, _HID6, _HID3, _HID2, _HID1, _HID, Correlation tests_HID13, Correlation tests_HID14, PCA_HID, PCA_HID1, PCA_HID2, Correlation tests_HID15, Correlation tests_HID16 …]
